# Supplementary material for: Reaction-induced Ni-based interstitial carbon atoms for coke-free dry reforming of methane
Source: Research Square preprint supplement (doi:10.21203/rs.3.rs-753881/v1), 2021-09-14
Supplement: Supplementary file 2 [file b7cd507cc8032b5b7a6c3079.docx]

**Supplementary Information for**

**Reaction-induced Ni-based interstitial carbon atoms for coke-free dry reforming of methane**

Qianqian Wang1,+, Wu Wang2,+, Sha Li1, Min Cao1, Pengfei Wang3, Xiaoliang Yan1,4,*, Ruifeng Li1,4

1College of Chemistry and Chemical Engineering, Taiyuan University of Technology, Taiyuan, Shanxi, 030024, P. R. China. 2 Department of Physics, Southern University of Science and Technology, Shenzhen, Guangdong, 518055, P. R. China. 3State Key Laboratory of Clean and Efficient Coal Utilization, Institute of Coal Chemistry, Chinese Academy of Sciences, Taiyuan, Shanxi, 030001, P. R. China. 4Key Laboratory of Coal Science and Technology of Ministry of Education and Shanxi Province, Taiyuan University of Technology, Taiyuan, Shanxi 030024, P. R. China.

These authors contributed equally: Qianqian Wang and Wu Wang.

Corresponding author, *e-mail: yanxiaoliang@tyut.edu.cn

**This PDF file includes:**

Supplementary Figures 1 to 17

Supplementary Tables 1 to 3

Supplementary Note

Supplementary References

**Supplementary Note**

**Thermodynamic study.** The Gibbs free energy change of the reaction (Ni3Zn + 0.7CH4 → Ni3ZnC0.7 + 1.4H2, Equation 1) was calculated in the temperature range from 27 to 627℃. The general gradient approximation (GGA) with the Perdew–Burke–Ernzerhof (PBE) functional[1, 2] were performed for the structure optimization of H2, CH4, Ni3Zn and Ni3ZnC0.7. To better describe the structure of Ni3Zn and Ni3ZnC0.7, a crystal model of Ni60Zn20 and Ni60Zn20C14 were selected. The projected-augmented wave (PAW)[3] pseudopotential was employed to treat the electron-ion interaction with cut-off energy of 500 eV and the k-points meshes were sampled as 3×3×3. The density functional dispersion correction (DFT-D3)[4] was used to consider the van der Waals interactions. All the above calculations were carried out in Vienna Ab initio Simulation Package (VASP)[[5, 6](#_ENREF_36" \o "Kresse, 1996 #87)]. The convergence criteria of total energy and force were 1×10-6 eV and 0.01 eV/Å, respectively. In the temperature range from 27 to 627℃, all of the thermodynamic data of Ni60Zn20 and Ni60Zn20C14 were obtained by Phonopy package[7], and the thermodynamic data of H2 and CH4 were obtained by Vaspkit code[8]. The Gibbs free energy change of the reaction (Equation 1) was obtained by following formula:

where represents the Gibbs free energy change of the reaction (Equation 1), represents the Gibbs free energy of Ni60Zn20C14, Ni60Zn20, CH4 and H2.

**Supplementary Table 1**. The Gibbs free energy of Ni60Zn20C14, Ni60Zn20, CH4, H2 and the Gibbs free energy change of the reaction between Ni3Zn and CH4.

| Temperature (℃) | Ni60Zn20C14  (kJ/mol) | Ni60Zn20  (kJ/mol) | CH4  (kJ/mol) | H2  (kJ/mol) | ΔrG  (kJ/mol) |
| --- | --- | --- | --- | --- | --- |
| 27 | -55787.22 | -37921.96814 | -2241.339513 | -603.699744 | -169.5046482 |
| 77 | -55917.74 | -38038.25826 | -2250.762105 | -610.136832 | -172.6323159 |
| 127 | -56061.80 | -38168.14782 | -2260.456665 | -616.781472 | -175.857069 |
| 177 | -56217.85 | -38310.30438 | -2270.405625 | -623.607552 | -179.1438428 |
| 227 | -56384.64 | -38463.61519 | -2280.596793 | -630.594912 | -182.4664086 |
| 277 | -56561.16 | -38627.1401 | -2291.020569 | -637.727136 | -185.8046586 |
| 327 | -56746.56 | -38800.07635 | -2301.669177 | -644.991264 | -189.1437547 |
| 377 | -56940.14 | -38981.73196 | -2312.535609 | -652.376064 | -192.4718276 |
| 427 | -57141.27 | -39171.50522 | -2323.613721 | -659.872416 | -195.7800542 |
| 477 | -57349.44 | -39368.86884 | -2334.897849 | -667.472256 | -199.0611963 |
| 527 | -57564.19 | -39573.35741 | -2346.382809 | -675.168672 | -202.3095723 |
| 577 | -57785.11 | -39784.55747 | -2358.063609 | -682.955616 | -205.5207485 |
| 627 | -58011.84 | -40002.09955 | -2369.935545 | -690.827904 | -208.6914027 |

**Supplementary Table 2**. Reaction rate and rate constant with different partial pressure of CH4 at 390, 400, 410 and 420℃ during DRM.

| Temperature (℃) | Partial pressure of reactant  (kPa) | | Reaction rate  (mol gcat-1·s-1） | | k1 |
| --- | --- | --- | --- | --- | --- |
| CH4 | CO2 | CH4 | CO2 |
| 390 | 19.50 | 48.59 | 6.01×10-7 | 4.40×10-6 | 0.172 |
| 29.60 | 49.19 | 1.05×10-6 | 4.48×10-6 |
| 39.05 | 48.46 | 1.70×10-6 | 3.94×10-6 |
| 48.50 | 48.45 | 2.06×10-6 | 4.33×10-6 |
| 400 | 19.34 | 48.18 | 8.39×10-7 | 5.97×10-6 | 0.233 |
| 29.58 | 49.10 | 1.46×10-6 | 5.86×10-6 |
| 39.18 | 48.53 | 2.18×10-6 | 5.06×10-6 |
| 48.71 | 48.58 | 2.74×10-6 | 5.34×10-6 |
| 410 | 19.14 | 47.74 | 9.81×10-7 | 6.62×10-6 | 0.324 |
| 29.01 | 48.12 | 2.23×10-6 | 8.18×10-6 |
| 38.80 | 47.92 | 2.99×10-6 | 6.94×10-6 |
| 48.13 | 47.84 | 3.47×10-6 | 6.79×10-6 |
| 420 | 19.09 | 47.67 | 1.36×10-6 | 8.71×10-6 | 0.413 |
| 28.80 | 47.76 | 2.48×10-6 | 8.94×10-6 |
| 38.50 | 47.52 | 3.42×10-6 | 7.73×10-6 |
| 47.64 | 47.22 | 4.88×10-6 | 8.85×10-6 |

**Supplementary Table 3**. Reaction rate and rate constant with different partial pressure of CO2 at 390, 400, 410 and 420℃ during DRM.

| Temperature (℃) | Partial pressure of reactant  (kPa) | | Reaction rate  (mol gcat-1·s-1） | | k2 |
| --- | --- | --- | --- | --- | --- |
| CH4 | CO2 | CH4 | CO2 |
| 390 | 48.82 | 19.41 | 4.28×10-6 | 1.48×10-6 | 0.460 |
| 49.02 | 29.27 | 2.92×10-6 | 2.18×10-6 |
| 48.60 | 38.93 | 2.93×10-6 | 3.59×10-6 |
| 48.68 | 48.60 | 4.98×10-6 | 6.54×10-6 |
| 400 | 49.18 | 19.44 | 3.48×10-6 | 1.55×10-6 | 0.519 |
| 48.87 | 29.07 | 3.40×10-6 | 2.65×10-6 |
| 48.36 | 38.62 | 3.49×10-6 | 4.35×10-6 |
| 48.77 | 48.54 | 4.71×10-6 | 6.90×10-6 |
| 410 | 49.02 | 19.25 | 4.42×10-6 | 1.93×10-6 | 0.621 |
| 49.25 | 29.18 | 3.90×10-6 | 3.10×10-6 |
| 48.60 | 38.71 | 3.92×10-6 | 4.99×10-6 |
| 48.66 | 48.34 | 5.75×10-6 | 8.36×10-6 |
| 420 | 49.30 | 19.24 | 3.74×10-6 | 2.03×10-6 | 0.684 |
| 48.99 | 28.88 | 4.04×10-6 | 3.55×10-6 |
| 48.43 | 38.44 | 4.45×10-6 | 5.81×10-6 |
| 48.83 | 48.37 | 5.48×10-6 | 8.66×10-6 |


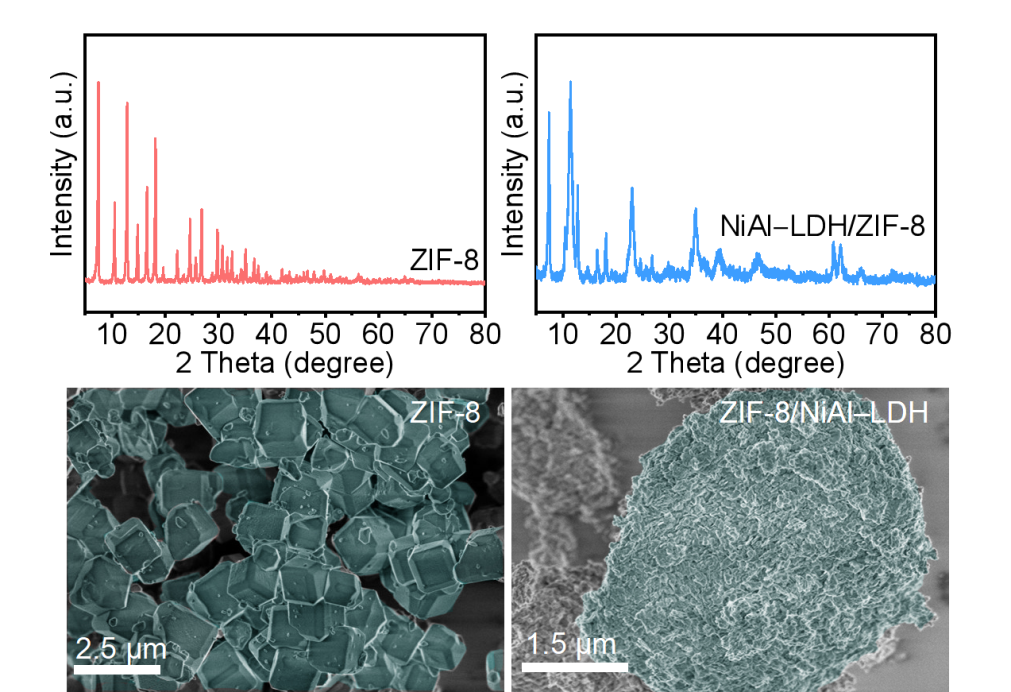


a

b

c

d

**Supplementary Figure 1. a**, **b**,XRD patterns and **c**, **d**, SEM images of (a, c) ZIF-8 and (b, d) ZIF-8/NiAl−LDH composite.


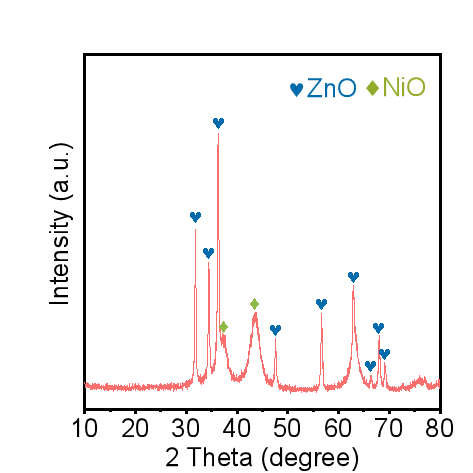


**Supplementary Figure 2.** XRD pattern of NiO−ZnO/Al2O3.


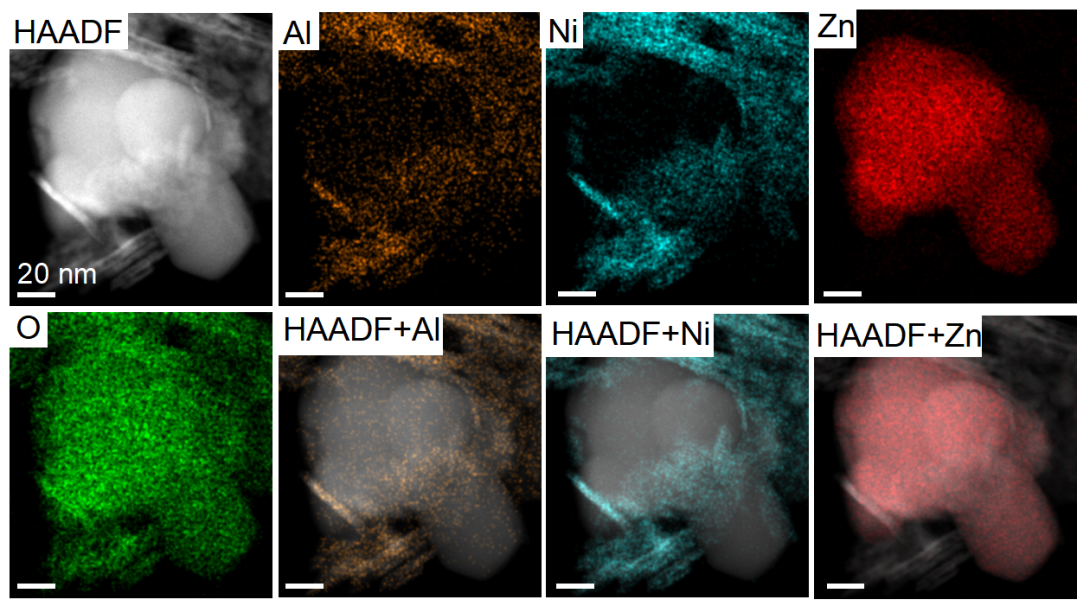


**Supplementary Figure 3.** STEM−HAADF images with elemental mapping of NiO−ZnO/Al2O3.


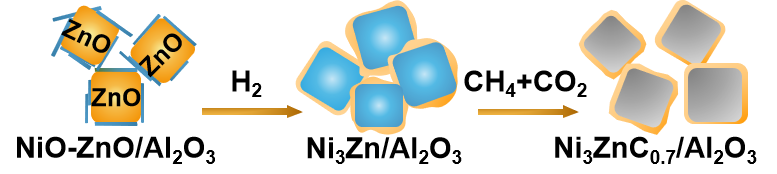


**Supplementary Figure 4.** Schematic illustration of the process of the changes from NiO−ZnO/Al2O3 to Ni3Zn/Al2O3 under H2 reduction and further to Ni3ZnC0.7/Al2O3 during DRM.


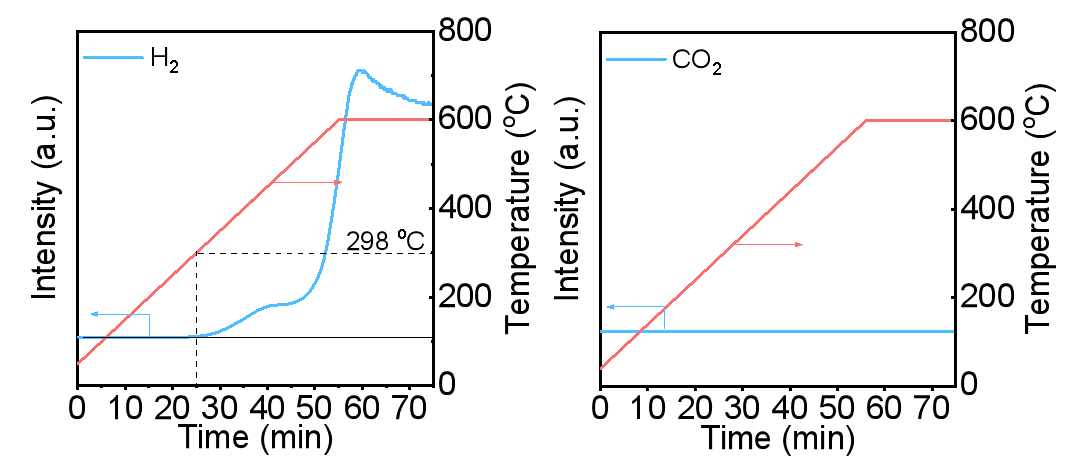


a

b

**Supplementary Figure 5.** TPSR−MS results of Ni3Zn/Al2O3 at elevated temperatures under (a) CH4 and (b) CO atmosphere.


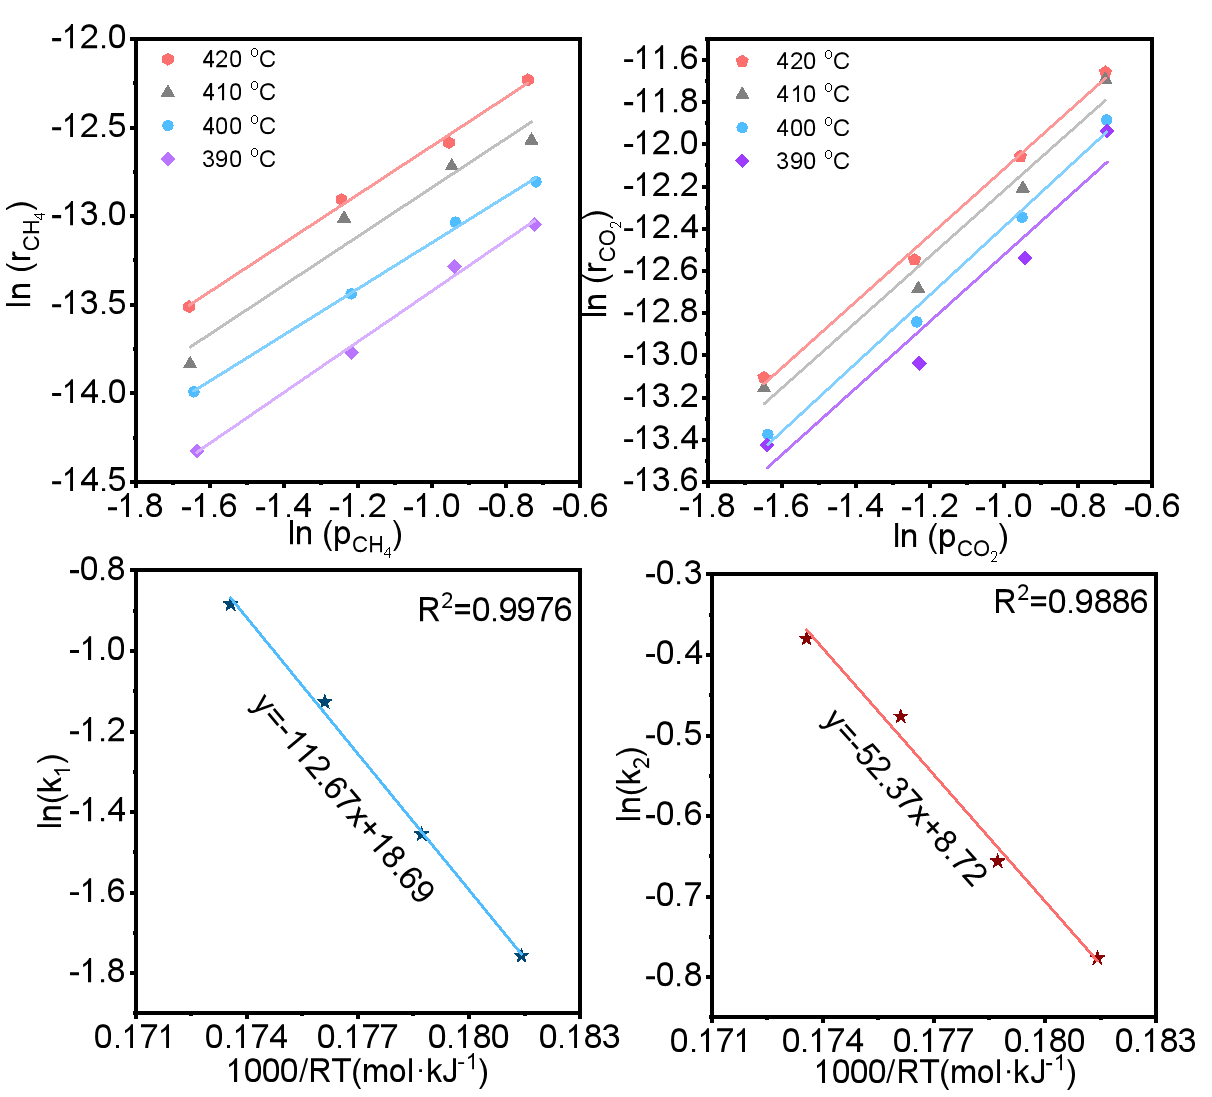


a

b

c

d

**Supplementary Figure 6.** (a, b) Changes of reaction rates as the partial concentration of reactants changes and the corresponding Arrhenius plots for (c) CH4 and (d) CO2 activation energies over Ni3ZnC0.7/Al2O3.


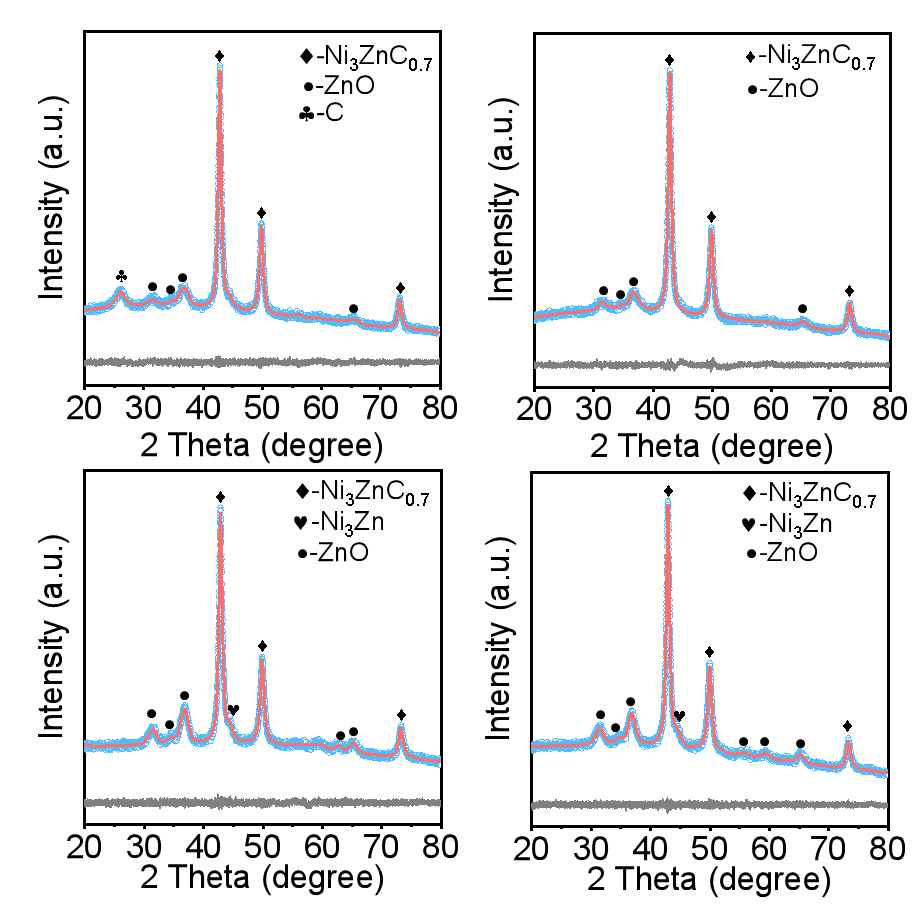


a

b

c

d

**Supplementary Figure 7.** Refined XRD patterns of Ni3ZnC0.7/Al2O3 after 100 h DMR at 500℃ with CH4/CO2 ratio of (a) 4/1, (b) 2/1, (c) 1/2 and (d) 1/4.


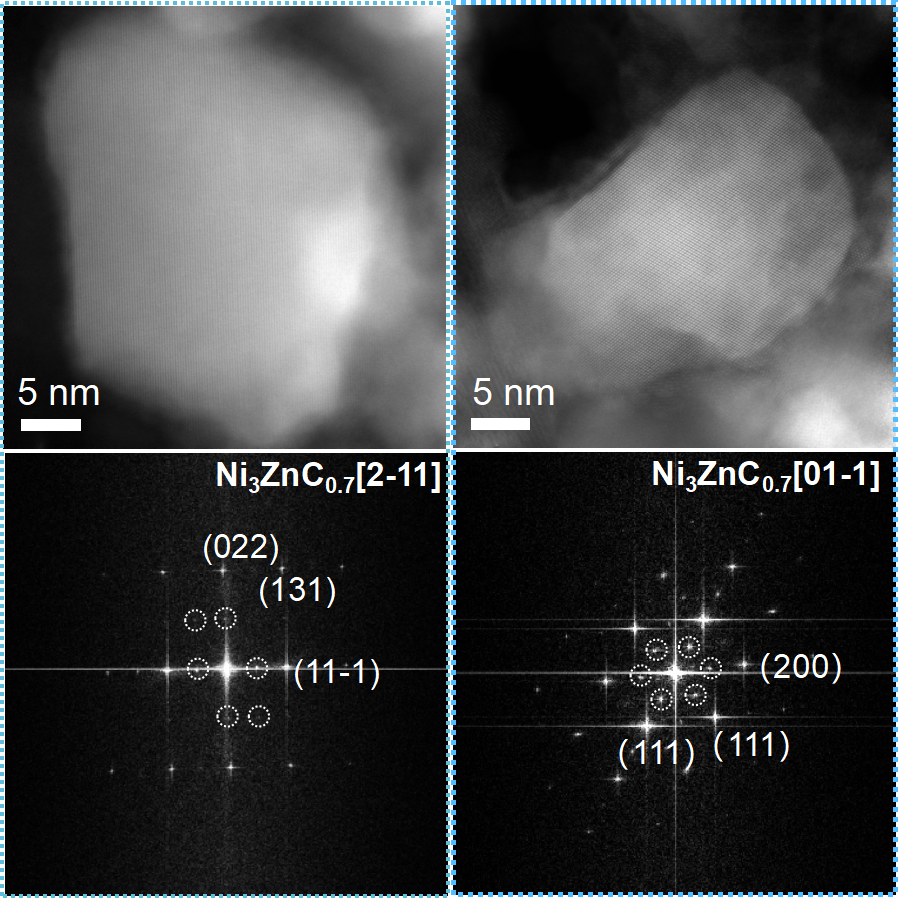


a

b

**Supplementary Figure 8.** HRTEM images and SAED patterns of Ni3ZnC0.7/Al2O3 after 100 h reaction with CH4/CO2 ratio of 1/1 in different regions and different crystal axis directions.


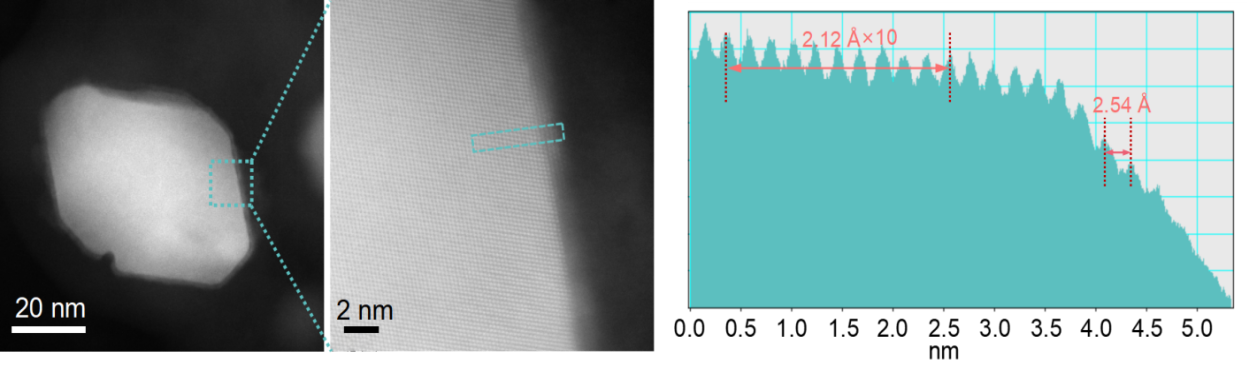


a

b

c

**Supplementary Figure 9.** (a) TEM, (b) HRTEM images, and (c) corresponding profile of the Ni3ZnC0.7/Al2O3.


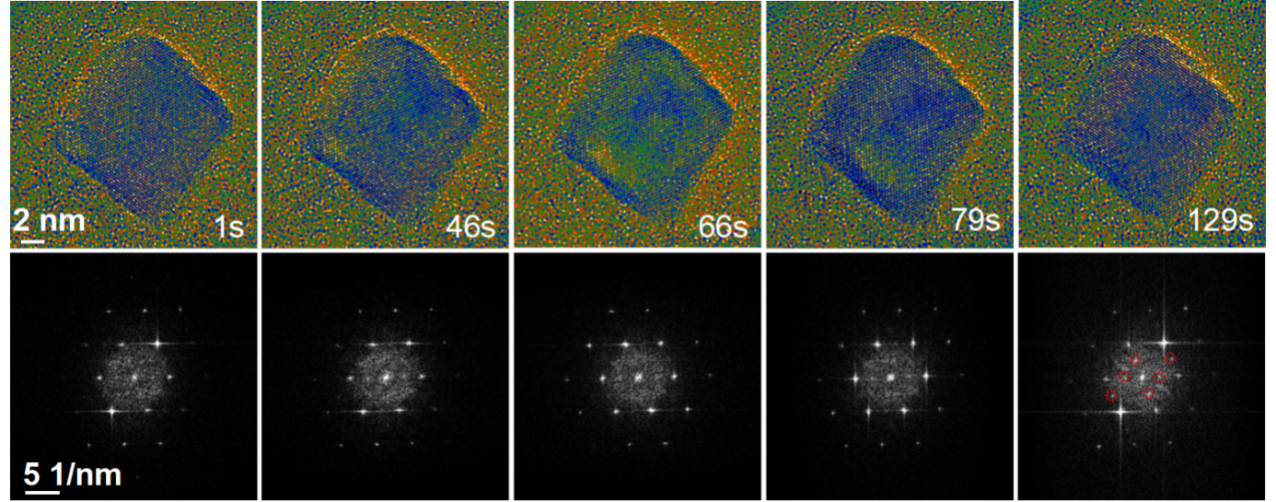


a

b

**Supplementary Figure 10.** (a) Color-coded in-situ HRTEM images on the evolution from Ni3Zn to Ni3ZnC0.7 during the DMR with CH4/CO2 ratio of 1/1 at 500℃ and (b) corresponding FFT images.


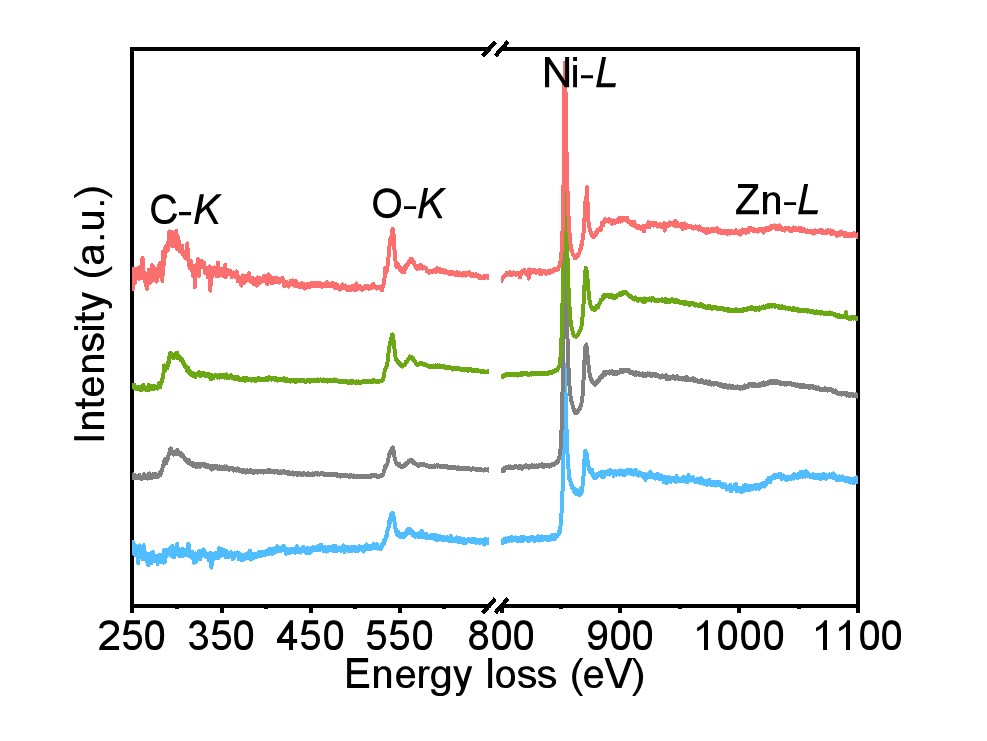


**Supplementary Figure 11.** In situ EEL spectra of Ni3Zn/Al2O3 during DRM with CH4/CO2 ratio of 1/1. The profile from bottom to up was obtained at room temperature, at 500℃ under CH4 and CO2, at 500℃ without reactants, and at room temperature after the reaction.


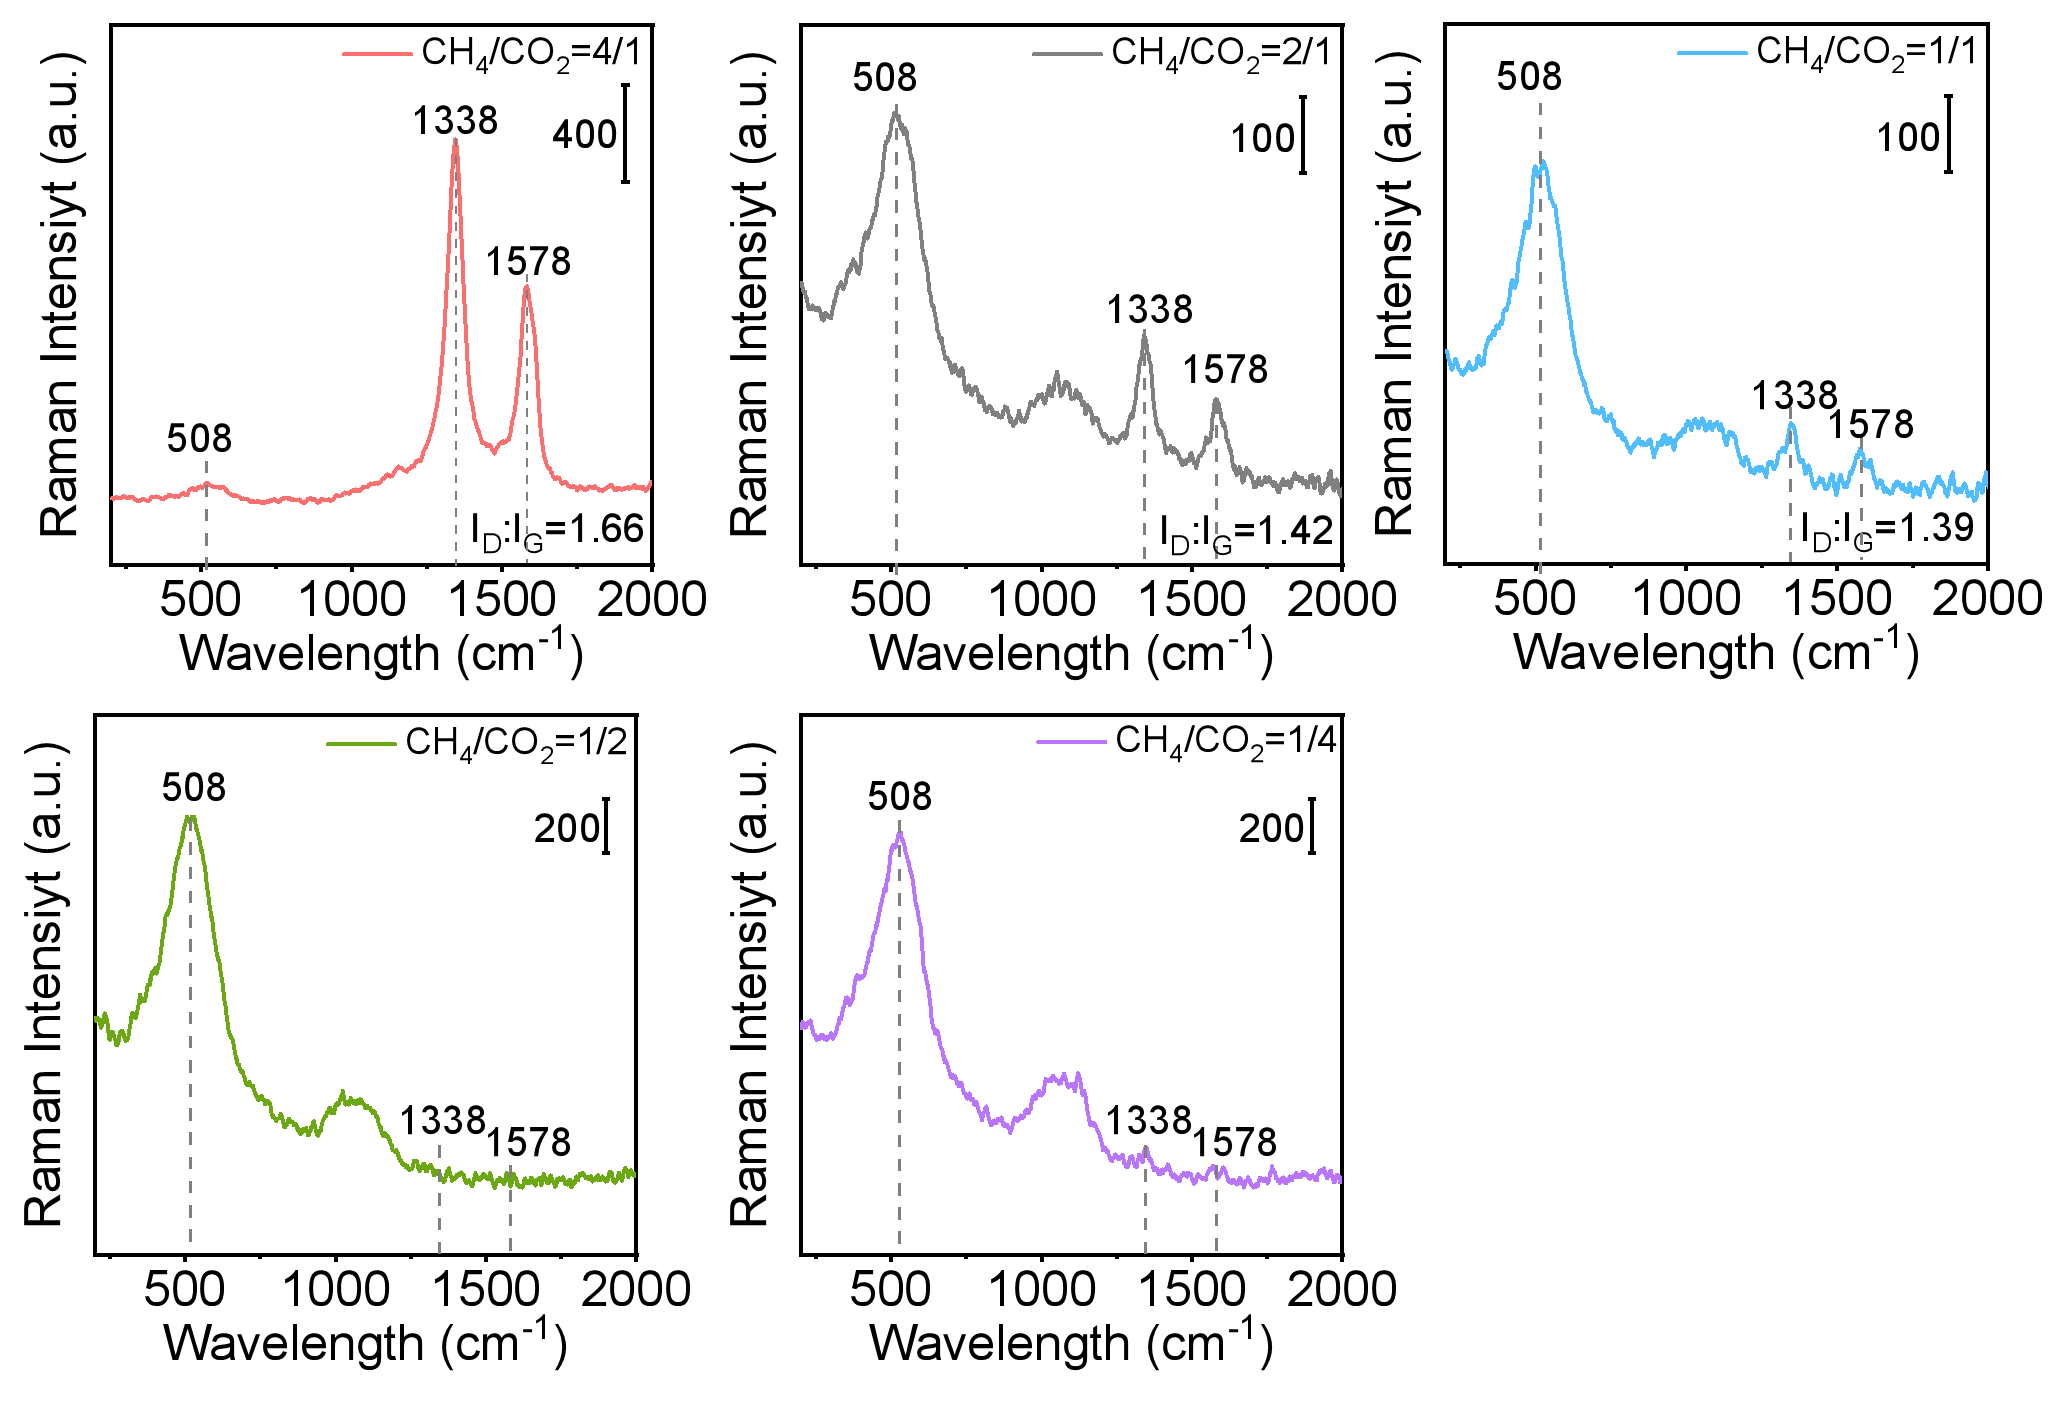


a

b

c

d

e

**Supplementary Figure 12.** Raman spectra of the catalysts after 100 h at 500℃ with CH4/CO2 ratio of (a) 4/1, (b) 2/1, (c) 1/1, (d) 1/2 and (e) 1/4.


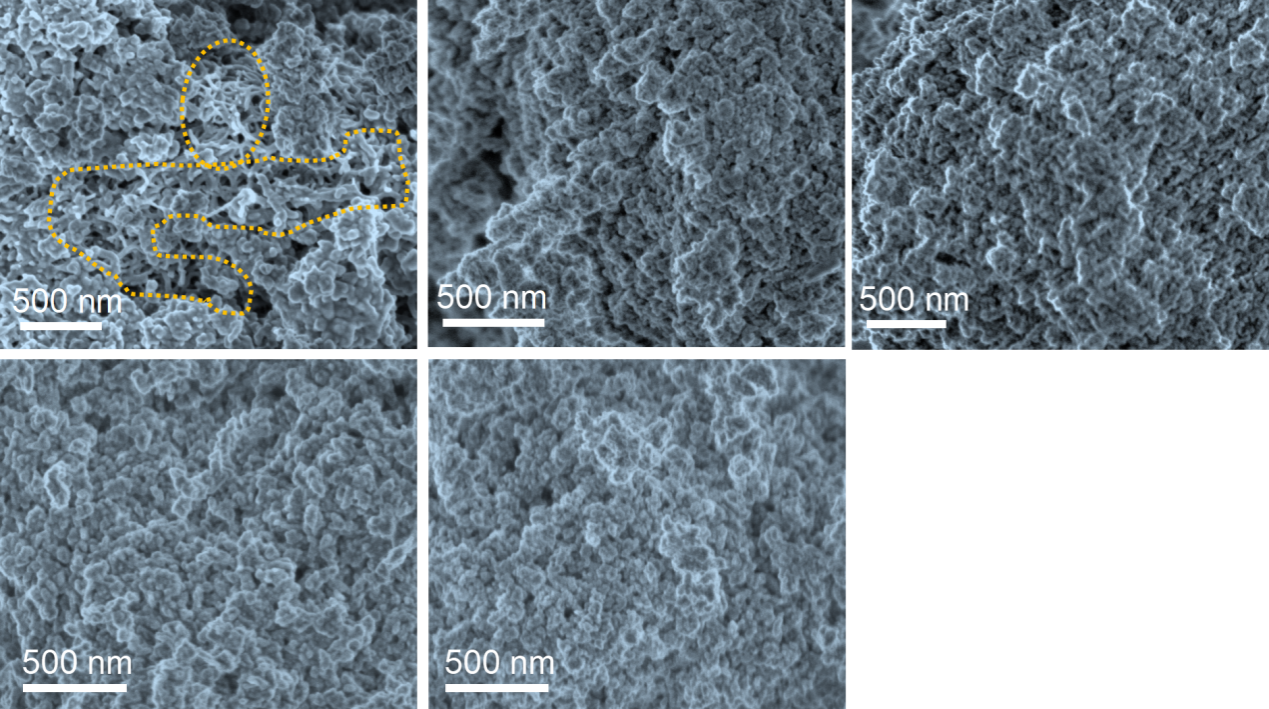


a

b

c

d

e

**Supplementary Figure 13.** SEM images of Ni3ZnC0.7/Al2O3 after 100 h period at 500℃ with CH4/CO2 ratio of (a) 4/1, (b) 2/1, (c) 1/1, (d) 1/2, and (e) 1/4.


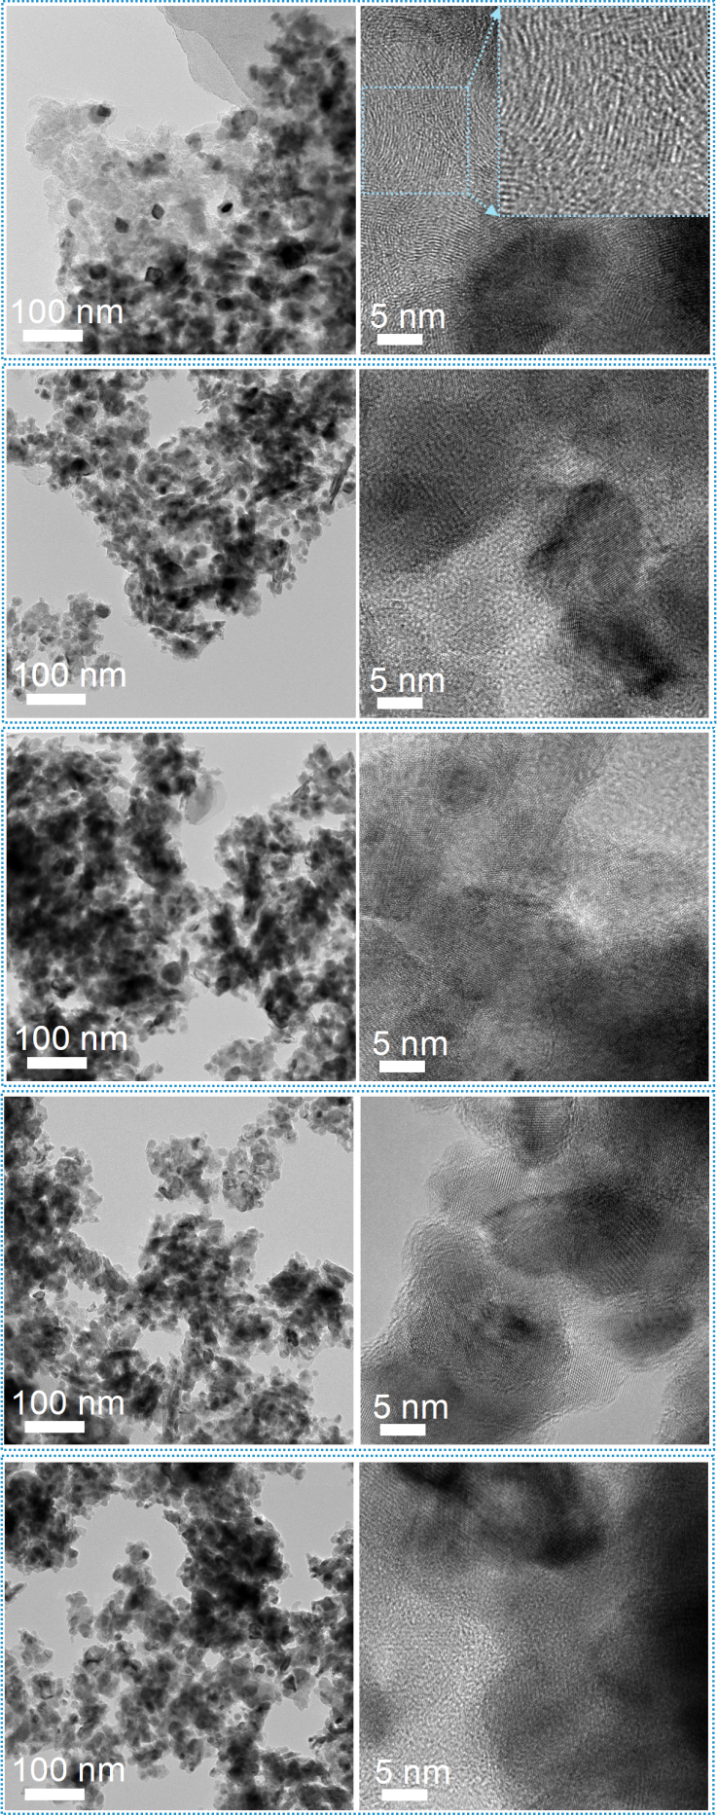


a

c

e

g

i

b

d

f

h

j

**Supplementary Figure 14.** TEM and HRTEM images of Ni3ZnC0.7/Al2O3 after 100 h period at 500℃ with CH4/CO2 ratio of (a, b) 4/1, (c, d) 2/1, (e, f) 1/1, (g, h) 1/2, and (i, j) 1/4.


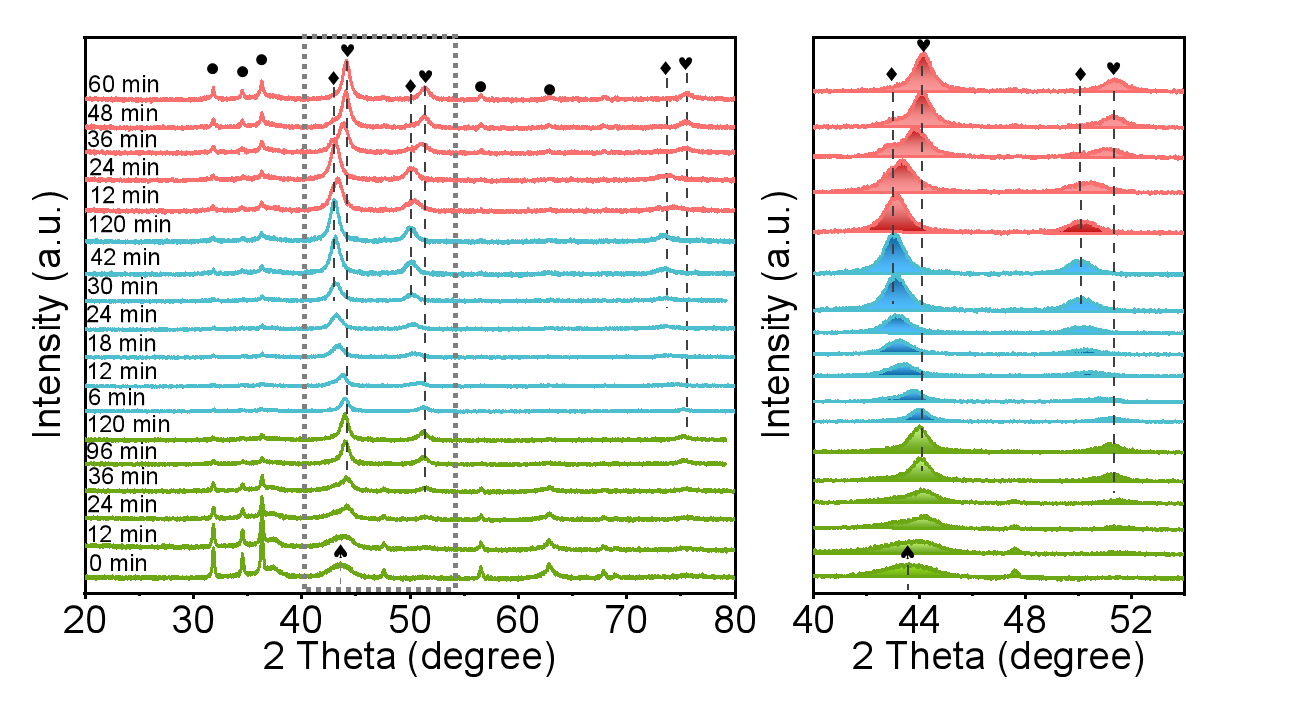


a

b

**Supplementary Figure 15.** **a,** In situ (a) XRD patterns and (b) cross sections of NiO−ZnO/Al2O3 under H2 reduction process at 550℃ (green curve), and then under DRM with CH4/CO2 ratio of 1/1 at 500℃ (blue curve), and further under CO2 at 500℃ (pink curve). ●, ♥, ♦ and ♠: ZnO, Ni3Zn, Ni3ZnC0.7 and NiO.


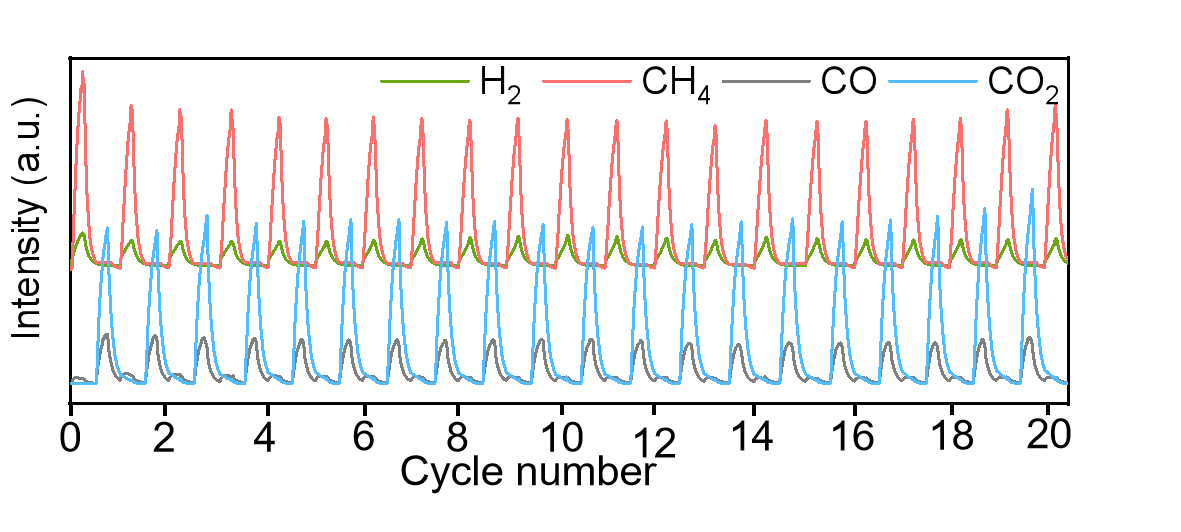


**Supplementary Figure 16.** Pulse experiment of CH4−Ar−CO2−Ar−CH4 cycles for the reduced catalyst at 600℃.


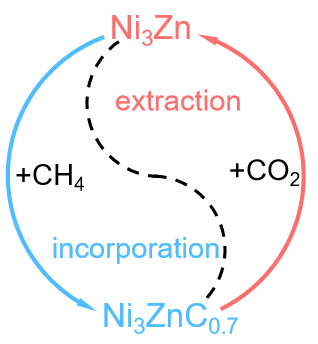


**Supplementary Figure 17.** Illustration of carbon cycle between Ni3Zn and Ni3ZnC0.7 during DRM.

**Supplementary References**

1. Perdew, J. P., Burke, K. & Ernzerhof, M. Generalized gradient approximation made simple. *Phys. Rev. Lett.* **77**, 3865-3868 (1996).
2. Kresse, G. & Furthmüller, J. Efficient iterative schemes for ab initio total-energy calculations using a plane-wave basis set. *Phys. Rev. B* **54**, 11169-11186 (1996).
3. Blöchl, P. E., Jepsen, O. & Andersen, O. K. Improved tetrahedron method for brillouin-zone integrations. *Phys. Rev. B* **49**, 16223-16233 (1994).
4. Grimme, S., Antony, J., Ehrlich, S. & Krieg, H. A consistent and accurate ab initio parametrization of density functional dispersion correction (DFT-D) for the 94 elements H-Pu. *J. Chem. Phys.* **132**, 154104 (2010).
5. Kresse, G. & Furthmüller, J. Efficiency of ab-initio total energy calculations for metals and semiconductors using a plane-wave basis set. *Comput. Mater. Sci.* **6**, 15-50 (1996).
6. Kresse, G. & Joubert, D. From ultrasoft pseudopotentials to the projector augmented-wave method. *Phys. Rev. B* **59**, 1758-1775 (1999).
7. Kresse, G., Furthmüller, J. & Hafner, J. Ab initio force constant approach to phonon dispersion relations of diamond and graphite. *Europhysics Lett.* **32**, 729-734 (1995).
8. Wang, V., Xu, N., Liu, J. C., Tang, G. & Geng W. T. VASPKIT: A user-friendly interface facilitating high–throughput computing and analysis using VASP code. *Comput. Phys. Commun.* **267**, 108033 (2021).
